# Supplementary material
Source: Springer Nature journal article supplement (https://www.springermedizin.de/resource/supplementary/12889_2007_1023_MOESM3_ESM.pdf/9503156)

### model 1

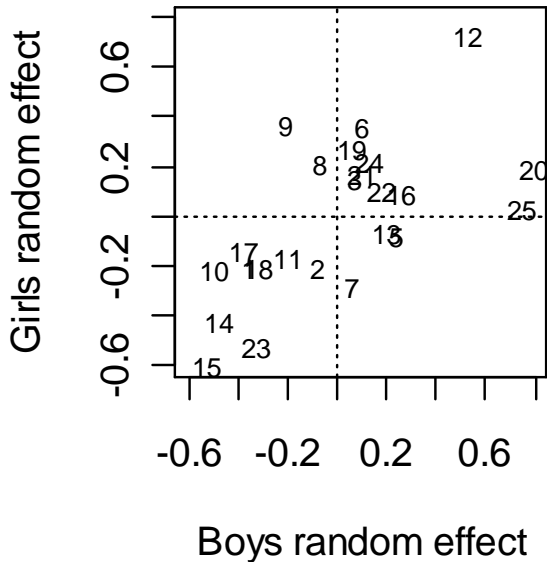

### model 7

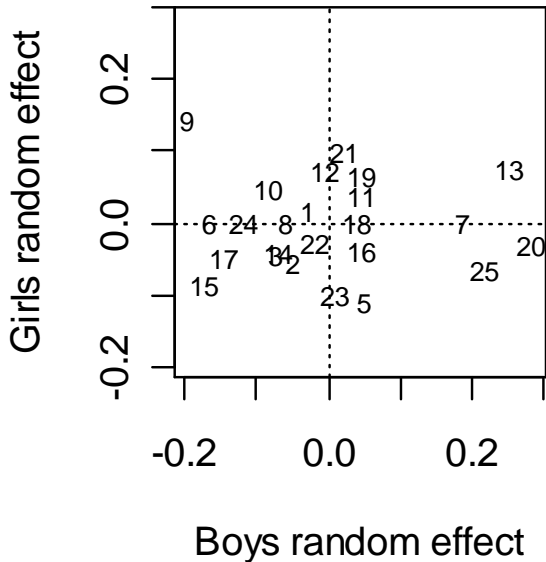

Supplement: MOESM3 [file 9503156]
